# Supplementary material for: Core Health Outcomes in Childhood Epilepsy (CHOICE): Development of a core outcome set using systematic review methods and a Delphi survey consensus
Source: PubMed Central journal article supplement (PMC6563436; doi:10.1111/epi.14735), 2019-04-25
Supplement: EPI-60-857-s001.pdf [file EPI-60-857-s001.pdf]

## SEARCH LOG 1

| DATABASE | DATE    | Number of hits |
|----------|---------|----------------|
| CDSR     | 28/9/17 | 56             |
| DARE     | 28/9/17 | 10             |
| CENTRAL  | 28/9/17 | 60             |
| MEDLINE  | 28/9/17 | 15             |
| EMBASE   | 28/9/17 | 28             |
| PSYCINFO | 28/9/17 | 5              |
| CINAHL   | 28/9/17 | 4              |

TOTAL: 147

DUPLICATES REMOVED: 33

NUMBER FOR REVIEW: 114 (RCTs 56; potential SRs 58)

### Search strategies

Cochrane Library databases

CENTRAL

Search Name: Epilepsy outcomes

Date Run: 28/09/17 09:37:42.862

Description:

| ID | Search                                                  | Hits |
|----|---------------------------------------------------------|------|
| #1 | MeSH descriptor: [Epilepsy, Rolandic] explode all trees | 14   |
| #2 | rolandic:ti,ab                                          | 40   |
| #3 | BCECTS:ti,ab                                            | 2    |
| #4 | "centro temporal spikes":ti,ab                          | 3    |
| #5 | "centrotemporal spikes":ti,ab                           | 24   |
| #6 | (child* near/3 epilep*):ti,ab                           | 611  |
| #7 | #1 or #2 or #3 or #4 or #5                              | 62   |

CDSR/DARE

Search Name: Epilepsy outcomes

Date Run: 28/09/17 09:37:42.862

Description:

| ID | Search                                                  | Hits |
|----|---------------------------------------------------------|------|
| #1 | MeSH descriptor: [Epilepsy, Rolandic] explode all trees | 14   |
| #2 | rolandic:ti,ab                                          | 40   |
| #3 | BCECTS:ti,ab                                            | 2    |
| #4 | "centro temporal spikes":ti,ab                          | 3    |
| #5 | "centrotemporal spikes":ti,ab                           | 24   |
| #6 | (child* near/3 epilep*):ti,ab                           | 611  |

#7 #1 or #2 or #3 or #4 or #5 62  
#8 #1 or #2 or #3 or #4 or #5 or #6 643

#### MEDLINE

Database: Ovid MEDLINE(R) Epub Ahead of Print, In-Process & Other Non-Indexed Citations, Ovid MEDLINE(R) Daily and Ovid MEDLINE(R) <1946 to Present>

Search Strategy:

- 
- 1 Epilepsy, Rolandic/ (543)
  - 2 rolandic.ti,ab. (1530)
  - 3 BCECTS.ti,ab. (53)
  - 4 centro temporal spikes.ti,ab. (119)
  - 5 centrotemporal spikes.ti,ab. (384)
  - 6 1 or 2 or 3 or 4 or 5 (1952)
  - 7 systematic.ti. (99433)
  - 8 (systematic\* adj2 review\*).ab. (92392)
  - 9 systematic overview.ti,ab. (845)
  - 10 evidence synthesis.ti,ab. (2775)
  - 11 (medline or pubmed).ab. (147225)
  - 12 7 or 8 or 9 or 10 or 11 (229623)
  - 13 6 and 12 (15)

#### EMBASE

Database: Embase <1974 to 2017 September 27>

Search Strategy:

- 
- 1 rolandic epilepsy/ (726)
  - 2 rolandic.ti,ab. (2129)
  - 3 BCECTS.ti,ab. (89)
  - 4 centro temporal spikes.ti,ab. (194)
  - 5 centrotemporal spikes.ti,ab. (552)
  - 6 1 or 2 or 3 or 4 or 5 (2835)
  - 7 "systematic review (topic)"/ (22189)
  - 8 systematic.ti. (114424)
  - 9 (systematic\* adj2 review\*).ab. (113048)
  - 10 systematic overview.ti,ab. (887)
  - 11 evidence synthesis.ti,ab. (3064)
  - 12 (medline or pubmed).ab. (176528)
  - 13 7 or 8 or 9 or 10 or 11 or 12 (286135)
  - 14 6 and 13 (28)

#### PsycINFO

Database: PsycINFO <1806 to September Week 4 2017>

Search Strategy:

- 
- 1 rolandic.ti,ab. (492)
  - 2 BCECTS.ti,ab. (29)
  - 3 centro temporal spikes.ti,ab. (42)

- 4 centrotemporal spikes.ti,ab. (136)
- 5 1 or 2 or 3 or 4 (616)
- 6 systematic.ti. (18146)
- 7 (systematic\* adj2 review\*).ab. (18292)
- 8 systematic overview.ti,ab. (221)
- 9 evidence synthesis.ti,ab. (424)
- 10 (medline or pubmed).ab. (16611)
- 11 6 or 7 or 8 or 9 or 10 (36715)
- 12 5 and 11 (5)

CINAHL

| Search ID# | Search Terms                                                                   | Actions                                                                                                                                                       |
|------------|--------------------------------------------------------------------------------|---------------------------------------------------------------------------------------------------------------------------------------------------------------|
| S15        | S6 AND S14                                                                     | <input type="checkbox"/> True <input type="text" value="S15"/> <a href="#">View Results</a> (4)<br><a href="#">View Details</a><br><a href="#">Edit</a>       |
| S14        | S7 OR S8 OR S9 OR S10 OR S11 OR S12 OR S13                                     | <input type="checkbox"/> True <input type="text" value="S14"/> <a href="#">View Results</a> (101,022)<br><a href="#">View Details</a><br><a href="#">Edit</a> |
| S13        | AB medline or pubmed                                                           | <input type="checkbox"/> True <input type="text" value="S13"/> <a href="#">View Results</a> (43,843)<br><a href="#">View Details</a><br><a href="#">Edit</a>  |
| S12        | TI ( metasyntesis or meta-synthesis ) OR AB ( metasyntesis or meta-synthesis ) | <input type="checkbox"/> True <input type="text" value="S12"/> <a href="#">View Results</a> (661)<br><a href="#">View Details</a><br><a href="#">Edit</a>     |
| S11        | TI evidence synthesis OR AB evidence synthesis                                 | <input type="checkbox"/> True <input type="text" value="S11"/> <a href="#">View Results</a> (1,611)<br><a href="#">View Details</a><br><a href="#">Edit</a>   |
| S10        | TI (systematic N2 overview) OR AB (systematic N2 overview)                     | <input type="checkbox"/> True <input type="text" value="S10"/> <a href="#">View Results</a> (397)<br><a href="#">View Details</a><br><a href="#">Edit</a>     |
| S9         | TI (systematic* N2 review*) OR AB (systematic* N2 review*)                     | <input type="checkbox"/> True <input type="text" value="S9"/> <a href="#">View Results</a> (60,487)<br><a href="#">View Details</a><br><a href="#">Edit</a>   |
| S8         | TI systematic                                                                  | <input type="checkbox"/> True <input type="text" value="S8"/> <a href="#">View Results</a> (44,192)<br><a href="#">View Details</a><br><a href="#">Edit</a>   |
| S7         | (MH "Systematic Review")                                                       | <input type="checkbox"/> True <input type="text" value="S7"/> <a href="#">View Results</a> (42,512)<br><a href="#">View Details</a>                           |

|    |                                                            |                                                                                                                                                                                                                                              |
|----|------------------------------------------------------------|----------------------------------------------------------------------------------------------------------------------------------------------------------------------------------------------------------------------------------------------|
|    |                                                            | <a href="#">Edit</a>                                                                                                                                                                                                                         |
| S6 | S1 OR S2 OR S3 OR S4 OR S5                                 | <input type="checkbox"/> True <input type="text" value="S6"/> <a href="#">View Results</a>  (138)<br><a href="#">View Details</a><br><a href="#">Edit</a> |
| S5 | TI centrotemporal spikes OR AB centrotemporal spikes       | <input type="checkbox"/> True <input type="text" value="S5"/> <a href="#">View Results</a>  (41)<br><a href="#">View Details</a><br><a href="#">Edit</a>  |
| S4 | TI "centro temporal spikes" OR AB "centro temporal spikes" | <input type="checkbox"/> True <input type="text" value="S4"/> <a href="#">View Results</a>  (11)<br><a href="#">View Details</a><br><a href="#">Edit</a>  |
| S3 | TI BCECTS OR AB BCECTS                                     | <input type="checkbox"/> True <input type="text" value="S3"/> <a href="#">View Results</a>  (5)<br><a href="#">View Details</a><br><a href="#">Edit</a>   |
| S2 | TI rolandic OR AB rolandic                                 | <input type="checkbox"/> True <input type="text" value="S2"/> <a href="#">View Results</a>  (98)<br><a href="#">View Details</a><br><a href="#">Edit</a>  |
| S1 | (MH "Epilepsy, Rolandic")                                  | <input type="checkbox"/> True <input type="text" value="S1"/> <a href="#">View Results</a>  (1)<br><a href="#">View Details</a><br><a href="#">Edit</a>  |
