# Supplementary material for: Core Health Outcomes in Childhood Epilepsy (CHOICE): Development of a core outcome set using systematic review methods and a Delphi survey consensus
Source: PubMed Central journal article supplement (PMC6563436; doi:10.1111/epi.14735), 2019-04-25
Supplement: EPI-60-857-s002.pdf [file EPI-60-857-s002.pdf]

**Table S2.1 - Characteristics of included papers**

| Study no. | Author (year) & (Reference no.)        | Type of study/study design                                                                                                                                                                                | Sample characteristics                                                                                                                                                                                                                                                                                      | Outcome domains                                                                                                           | Outcome measures                                                                                                                                                                                        |
|-----------|----------------------------------------|-----------------------------------------------------------------------------------------------------------------------------------------------------------------------------------------------------------|-------------------------------------------------------------------------------------------------------------------------------------------------------------------------------------------------------------------------------------------------------------------------------------------------------------|---------------------------------------------------------------------------------------------------------------------------|---------------------------------------------------------------------------------------------------------------------------------------------------------------------------------------------------------|
| 1         | Baca, C. B., et al. (2011).<br><br>(1) | <b>Observational</b><br><br>Prospective, community-based cohort study of newly diagnosed childhood epilepsy, with ongoing prospective follow up.                                                          | <ul style="list-style-type: none"> <li>• 277 children<br/>129 females, 148 males.</li> <li>• Mean age: 13 range: 8-17</li> <li>• New diagnosed epilepsy, unprovoked seizure between 28 days and 15 years.</li> </ul>                                                                                        | Health related quality of life<br><br>Cognitive function                                                                  | Child health questionnaire (CHQ)<br><br>Neurologic medical records, parent interviews, school records, and standardized neuro-psychological testing using the Wechsler Intelligence Scale for Children. |
| 2         | Baca, C. B. et al., (2012)<br><br>(2)  | <b>Observational</b><br><br>Prospective community-based study of long-term outcomes of childhood-onset epilepsy. (The Connecticut Study of Epilepsy).                                                     | <ul style="list-style-type: none"> <li>• 277 parent-child dyads</li> <li>• Mean age of child: 5.1, SD: 2.5.</li> <li>• Newly diagnosed childhood epilepsy.</li> </ul>                                                                                                                                       | Health related quality of life                                                                                            | Child health questionnaire (CHQ)                                                                                                                                                                        |
| 3         | Bast et al., (2003)<br><br>(3)         | <b>Systematic Review (SR)</b><br><br>SR of the influence of sulthiame on EEG in BECTS                                                                                                                     | <ul style="list-style-type: none"> <li>• 66 children</li> <li>• Diagnosis of BECTS</li> <li>• Mean age: 8.3, range 3-10 years</li> </ul>                                                                                                                                                                    | The rate of treatment failure events<br><br>EEG                                                                           | Any first seizure<br><br>EEG                                                                                                                                                                            |
| 4         | Benson, A., et al. (2016)<br><br>(4)   | <b>Qualitative</b><br><br>Mixed qualitative & quantitative in 2 stages. Phase one: qualitative exploratory design using semi-structured interviews.<br><br>Phase 2: Questionnaires/cross-sectional survey | Phase one: <ul style="list-style-type: none"> <li>• 33 Children aged 6-16 years, mean age: 7.33 and 40 parents.</li> <li>• Prescription of anti-epileptic medication</li> </ul> Phase two: <ul style="list-style-type: none"> <li>• 47 children aged 8-18 years; mean age 13.19, and 72 parents.</li> </ul> | Themes: Social exclusion in epilepsy, Activity restrictions, Teasing/bullying, concealment, stigma coaching<br><br>Stigma | Interview<br><br>Child Stigma Scale (CSS)                                                                                                                                                               |
| 5         | Borggraefe et al., (2013)              | <b>Randomised Controlled Trial (RCT)</b>                                                                                                                                                                  | <ul style="list-style-type: none"> <li>• 44 children between 6-12 years of age</li> <li>• Diagnosis of BECTS</li> </ul>                                                                                                                                                                                     | Primary endpoint: occurrence of a treatment failure event                                                                 | Occurrence of a seizure during the observation period – 24 weeks after reaching target dose.                                                                                                            |

Supplementary 2. Characteristics of included papers and provisional list of papers

| Study no. | Author (year) & (Reference no.)    | Type of study/study design                                                                                                                                                                  | Sample characteristics                                                                                                                                                            | Outcome domains                                                                                                                                                                                                                                                                                                                                                                                                                                                                                                                                                     | Outcome measures                                                                                           |
|-----------|------------------------------------|---------------------------------------------------------------------------------------------------------------------------------------------------------------------------------------------|-----------------------------------------------------------------------------------------------------------------------------------------------------------------------------------|---------------------------------------------------------------------------------------------------------------------------------------------------------------------------------------------------------------------------------------------------------------------------------------------------------------------------------------------------------------------------------------------------------------------------------------------------------------------------------------------------------------------------------------------------------------------|------------------------------------------------------------------------------------------------------------|
|           | (5)                                | Randomised, double-blinded controlled trial (over 26 months). Non inferiority trial of LEV (Levetiracetam) compared to STM (Sulthiame). Randomly allocated to the LEV or STM treatment arm. | <ul style="list-style-type: none"> <li>• LEV group (n=21): mean age: 8.7, 6 females</li> <li>• STM group (n=22): mean age: 9.0, 10 females</li> </ul>                             | Dropouts related to adverse events/occurrence of a drug related adverse reaction                                                                                                                                                                                                                                                                                                                                                                                                                                                                                    | Adverse events e.g. general symptoms, pain etc.<br>Urine analysis                                          |
| 6         | Chong et al. (2016)<br><br>(6)     | <b>SR of Qualitative Studies</b><br><br>Systematic review of qualitative studies on the experiences of children and adolescence.                                                            | <ul style="list-style-type: none"> <li>• 951 participants overall.</li> <li>• Participants aged 3-21 years</li> <li>• Diagnosed with epilepsy.</li> </ul>                         | Themes: Loss of Bodily Control: Being overtaken, Susceptibility to physical harm, Fragility of the brain, Alertness to mortality, Bodily powerlessness, Loss of Privacy: Declarative Disease, Humiliating Involuntary Action, Unwanted special attention, Social embarrassment of medicine taking, Inescapable inferiority and discrimination:<br>Vulnerability to Prejudice, Consciousness of abnormality, Limiting social freedom, Therapeutic Burden and Futility: Awaiting a Fabled Remission, Overwhelming Life Disruption, Social and spiritual connectedness | Interview                                                                                                  |
| 7         | Connock et al., (2006).<br><br>(7) | <b>SR</b><br><br>SR to examine the clinical effectiveness and cost-effectiveness of newer anti-epileptic drugs (AEDs) for epilepsy in children. Drugs included: gabapentin,                 | <ul style="list-style-type: none"> <li>• Young people with epilepsy under 18 years old and mixed age groups with epilepsy if including persons less than 18 years old.</li> </ul> | Premature discontinuation due to adverse events<br><br>Seizure frequency                                                                                                                                                                                                                                                                                                                                                                                                                                                                                            | Adverse events e.g. vomiting, infection, headache, fever.<br><br>The number of seizures during maintenance |

Supplementary 2. Characteristics of included papers and provisional list of papers

| Study no. | Author (year) & (Reference no.)   | Type of study/study design                                                                                                                                       | Sample characteristics                                                                                                                                                                                                                                                     | Outcome domains                                   | Outcome measures                                                                                                                                                                                                                                                                                                                                                                                                          |
|-----------|-----------------------------------|------------------------------------------------------------------------------------------------------------------------------------------------------------------|----------------------------------------------------------------------------------------------------------------------------------------------------------------------------------------------------------------------------------------------------------------------------|---------------------------------------------------|---------------------------------------------------------------------------------------------------------------------------------------------------------------------------------------------------------------------------------------------------------------------------------------------------------------------------------------------------------------------------------------------------------------------------|
|           |                                   | lamotrigine, levetiracetam, oxcarbazepine, tiagabine, topiramate and vigabatrin.                                                                                 |                                                                                                                                                                                                                                                                            |                                                   |                                                                                                                                                                                                                                                                                                                                                                                                                           |
| 8         | Coppola et al., (2007)<br><br>(8) | <b>RCT</b><br><br>Randomised to levetiracetam (LEV) group, and an Oxcarbazepine (OXC) group.<br><br>LEV & OXC – 5mg/kg – up to a daily maximum dose of 20 mg/kg. | <ul style="list-style-type: none"> <li>39 children aged between 3.3 to 14 years (m: 8.4) were randomised to receive monotherapy with LEV levetiracetam or OXC.</li> <li>New diagnosis of BECTS according to ILAEO, absence of neurological and mental deficits.</li> </ul> | Complete seizure freedom<br><br>Awake & sleep EEG | Seizure freedom (recorded in an epilepsy diary)<br><br>EEG                                                                                                                                                                                                                                                                                                                                                                |
| 9         | Smith et al., (2015)<br><br>(9)   | <b>Meta-Analysis</b><br><br>Evaluation of 22 studies of literacy and/or language skills in children with rolandic epilepsy, published after 2000.                | <ul style="list-style-type: none"> <li>Children and adolescents with rolandic epilepsy, aged 5-18 years.</li> </ul>                                                                                                                                                        | Language & Literacy                               | Reading measured with: GORT accuracy (Gray, Oral, Reading Tests), WIAT (Weschler Individual Achievement Test), WRAT (Wide Range Achievement Test)<br><br>Phonological processing measured with: TOWRE (test of word reading efficacy)<br><br>Expressive language measured with: CELF (Clinical Evaluation of Language Fundamentals)<br><br>Receptive language measured with: CELF, Peabody Picture Vocabulary Test (PPVT) |
| 10        | Gutter et al., (2013)<br><br>(10) | <b>Observational</b><br><br>Purpose of study were to explore the prevalence of                                                                                   | <ul style="list-style-type: none"> <li>131 children – partial epilepsy aged 4 to 10 years and 161 age and sex matched controls.</li> </ul>                                                                                                                                 | Sleep                                             | Sleep Disturbance Scale for children (SDSC), Medical Outcomes Study-Sleep Scale (MOSS –S) and Groningen                                                                                                                                                                                                                                                                                                                   |

Supplementary 2. Characteristics of included papers and provisional list of papers

| Study no. | Author (year) & (Reference no.) | Type of study/study design                                                                                                              | Sample characteristics                                                                                                                                                                                                                 | Outcome domains                                                                                                                                            | Outcome measures                                                                                                                                                                               |
|-----------|---------------------------------|-----------------------------------------------------------------------------------------------------------------------------------------|----------------------------------------------------------------------------------------------------------------------------------------------------------------------------------------------------------------------------------------|------------------------------------------------------------------------------------------------------------------------------------------------------------|------------------------------------------------------------------------------------------------------------------------------------------------------------------------------------------------|
|           |                                 | sleep disturbances in a large cohort of school-age children with partial epilepsy.                                                      |                                                                                                                                                                                                                                        | Restrictions in childhood epilepsy<br><br>School environment/Peers & social support/autonomy & parent relations/psychological wellbeing/physical wellbeing | Sleep Quality Scale (GSQS)<br>Hague Seizure Severity Scale (HSSS), the Hague Side Effects Scale (HaSES) and<br><br>Hague Restrictions in Childhood Epilepsy Scale (HaRCES)<br><br>Kidscreen-27 |
| 11        | Kim et al., (2015) (11)         | <b>Observational</b><br><br>Investigate cortical thickness and gray matter volume abnormalities in BECTS.                               | <ul style="list-style-type: none"> <li>20 children (14 males, mean age: 7.5),</li> <li>Newly diagnosed BECTS</li> </ul>                                                                                                                | EEG<br><br>Cortical thickness/grey matter                                                                                                                  | EEG<br><br>MRI                                                                                                                                                                                 |
| 12        | Lewis et al., (2008) (12)       | <b>Observational</b><br><br>E-survey and interviews                                                                                     | <ul style="list-style-type: none"> <li>44 children and young people with epilepsy aged 3-23 (parent responses on behalf of child).</li> <li>Interviews with a separate group of 22 children and young people with epilepsy.</li> </ul> | Impact of epilepsy on school                                                                                                                               | E-survey                                                                                                                                                                                       |
| 13        | Liu et al., (2016) (13)         | <b>RCT</b><br><br>Children were randomised into two groups Group 1: topiramate once every night<br><br>Group 2: topiramate twice a day. | <ul style="list-style-type: none"> <li>85 children</li> <li>54 males and 31 females aged from 3.3 years to 13 years. Diagnosed with benign childhood epilepsy</li> </ul>                                                               | EEG<br><br>Seizure frequency<br><br>Adverse events                                                                                                         | EEG<br><br>Parent recorded<br><br>Parent recorded/physiological measures of blood, urine.                                                                                                      |
| 14        | Loiselle et al., (2016)         | <b>Observational</b><br><br>Trajectories                                                                                                | <ul style="list-style-type: none"> <li>120 children with epilepsy and their care giver</li> </ul>                                                                                                                                      | Paediatric epilepsy side-effects                                                                                                                           | Paediatric Epilepsy Side Effects Questionnaire (PESQ) (Mortia et al., 2012).                                                                                                                   |

Supplementary 2. Characteristics of included papers and provisional list of papers

| Study no. | Author (year) & (Reference no.)   | Type of study/study design                                                                                                                 | Sample characteristics                                                                                                                                                                                           | Outcome domains                                                                                                                                                                                                                                           | Outcome measures                                                                                                                                                                                                                                                                                                                     |
|-----------|-----------------------------------|--------------------------------------------------------------------------------------------------------------------------------------------|------------------------------------------------------------------------------------------------------------------------------------------------------------------------------------------------------------------|-----------------------------------------------------------------------------------------------------------------------------------------------------------------------------------------------------------------------------------------------------------|--------------------------------------------------------------------------------------------------------------------------------------------------------------------------------------------------------------------------------------------------------------------------------------------------------------------------------------|
|           | (14)                              | of health-related quality of life (HRQOL) among children with newly diagnosed epilepsy, and evaluate key predictors of HRQOL trajectories. | <ul style="list-style-type: none"> <li>2-12 years old, received an epilepsy diagnosis on day of study recruitment</li> </ul>                                                                                     | <p>Health-related quality of life</p> <p>Parental fears about the impact of a child's seizures on functioning</p>                                                                                                                                         | <p>Care-giver proxy report version of the PedsQL 4.0 (Varni, Seid &amp; Kurtin, 2001).</p> <p>The Parent Report of Psychosocial Care (Austin, Dunn, Huster &amp; Rose, 1998) – Includes the five-item Concerns and Fears subscale (assesses parental fears about the impact of the child's seizures on functioning and outcomes)</p> |
| 15        | Melchionda et al., (1999)<br>(15) | <b>Observational</b><br><br>Evaluate long term evolution of headaches associated with rolandic centrotemporal spikes                       | <ul style="list-style-type: none"> <li>32 children with rolandic centro temporal spikes</li> </ul>                                                                                                               | Headache                                                                                                                                                                                                                                                  | Occurrence of symptom                                                                                                                                                                                                                                                                                                                |
| 16        | Mitsudome et al., (1997)<br>(16)  | <b>Observational</b><br><br>Effectiveness of clonazepam on rolandic discharges.                                                            | <ul style="list-style-type: none"> <li>32 children with centro temporal spikes (CTS) that has episodes of headache (16 females) with centro-temporal spikes (CTS) at EEG</li> <li>52 matched controls</li> </ul> | EEG                                                                                                                                                                                                                                                       | EEG                                                                                                                                                                                                                                                                                                                                  |
| 17        | Moffat et al., (2009)<br>(17)     | <b>Observational</b><br><br>Impact of childhood epilepsy on quality of life                                                                | <ul style="list-style-type: none"> <li>22 children (11 male, 11 female)</li> <li>Mean age; 9, Range: 7-12</li> <li>Experiences partial seizures and some generalised seizures.</li> </ul>                        | Themes: Impact on social life, developmental/role related issues, psychological epilepsy related issues, peer acceptance, school-related issues, academic impact, family reactions, adjustment, compliance, seizure experience, fear, coping, the future, | Interview                                                                                                                                                                                                                                                                                                                            |

Supplementary 2. Characteristics of included papers and provisional list of papers

| Study no. | Author (year) & (Reference no.)   | Type of study/study design                                                                                                          | Sample characteristics                                                                                                                                                                                     | Outcome domains                                                                                                                                  | Outcome measures                                                                                                                 |
|-----------|-----------------------------------|-------------------------------------------------------------------------------------------------------------------------------------|------------------------------------------------------------------------------------------------------------------------------------------------------------------------------------------------------------|--------------------------------------------------------------------------------------------------------------------------------------------------|----------------------------------------------------------------------------------------------------------------------------------|
|           |                                   |                                                                                                                                     |                                                                                                                                                                                                            | translational periods, medical experiences, emotional impact                                                                                     |                                                                                                                                  |
| 18        | Nevitt et al., (2016)<br><br>(18) | <b>SR</b><br><br>RCT's with a comparison of carbamazepine monotherapy with phenobarbitone monotherapy in individuals with epilepsy  | <ul style="list-style-type: none"> <li>Children or adults with partial onset seizures</li> <li>Individuals with a new diagnosis of epilepsy</li> </ul>                                                     | Seizures<br><br>Adverse events<br><br>IQ<br><br>Memory                                                                                           | Incidence of seizures<br><br>Side effects, withdrawals, incidence of allergic reactions<br><br>WISC-R Scale, Bender-Gestalt test |
| 19        | Rating et al., (2000)<br><br>(19) | <b>RCT</b><br><br>Children were randomized to receive either STM or a placebo                                                       | <ul style="list-style-type: none"> <li>66 children</li> <li>Aged between 3-10 years</li> <li>Diagnosis of BECTS (or has 2 ore</li> </ul>                                                                   | Adverse events                                                                                                                                   | Adverse event                                                                                                                    |
| 20        | Reilly et al., (2015)<br><br>(20) | <b>Observational</b><br><br>Factors associated with quality of life in childhood epilepsy.                                          | <ul style="list-style-type: none"> <li>Children recruited from the CHES study (identification of children with 'active' epilepsy born between 1995 and 2007'.</li> <li>Children aged 5-15 years</li> </ul> | Quality of life                                                                                                                                  | QOLCE US                                                                                                                         |
| 21        | Ronen et al., (1999)<br><br>(21)  | <b>Observational/qualitative</b><br><br>Identifying the attributes of Health related quality of life (HRQOL) in childhood epilepsy. | <ul style="list-style-type: none"> <li>29 children and their parents</li> <li>Mean age: 9.2</li> <li>Simple/complex partial seizures</li> </ul>                                                            | Themes: Experience of epilepsy, life fulfilment/time use, home activities, school issues, and activities, social experiences, impact of epilepsy | Interview                                                                                                                        |
| 22        | Sajobi et al., (2017)<br><br>(22) | <b>Observational</b><br><br>Trajectories across health related quality of life domains in children with new onset epilepsy          | <ul style="list-style-type: none"> <li>373 children with new-onset epilepsy</li> </ul>                                                                                                                     | Family life event changes<br><br>Family functioning/resources                                                                                    | The Family Inventory of Life Event Changes (FILE)<br><br>Family inventory of resources and management (FIRM)                     |

Supplementary 2. Charactersitics of included papers and provisional list of papers

| Study no. | Author (year) & (Reference no.)      | Type of study/study design                                                                           | Sample characteristics                                                                                                                                                                                               | Outcome domains                                                                       | Outcome measures                                                                                                                                                                                        |
|-----------|--------------------------------------|------------------------------------------------------------------------------------------------------|----------------------------------------------------------------------------------------------------------------------------------------------------------------------------------------------------------------------|---------------------------------------------------------------------------------------|---------------------------------------------------------------------------------------------------------------------------------------------------------------------------------------------------------|
|           |                                      |                                                                                                      |                                                                                                                                                                                                                      | Health-related quality of life<br><br>Epilepsy severity                               | QOLCE-55<br><br>Global Assessment of Severity of Epilepsy (GASE)<br><br>The Family adaptability, partnership, growth, affection and resolve (APGAR)                                                     |
| 23        | Schmitt et al., (2009)<br><br>(23)   | <b>Observational</b><br><br>Effects of valproic acid on sleep in children with epilepsy              | <ul style="list-style-type: none"> <li>• 46 children</li> <li>• Aged 1.7-17.4 years, mean 8.4</li> <li>• History of generalised epilepsies</li> </ul>                                                                | Sleep                                                                                 | Sleep habits survey                                                                                                                                                                                     |
| 24        | Schraegle et al., (2016)<br><br>(24) | <b>Observational</b><br><br>Executive functioning and HRQOL in childhood epilepsy                    | <ul style="list-style-type: none"> <li>• 130 children</li> <li>• Mean age: 11.6 years, SD: 3.6 years</li> <li>• Epilepsy diagnosis</li> </ul>                                                                        | Executive functioning<br><br>Behaviour<br><br>Memory<br><br>Intelligence<br><br>HRQOL | Behaviour rating inventory of executive functioning (BRIEF)<br><br>BRIEF<br><br>BRIEF<br><br>Wechsler Intelligence Scales (WSI-II) (WISC-IV)<br><br>Quality Of Life in Childhood Epilepsy scale (QOLCE) |
| 25        | Seidel et al., (1999)<br><br>(25)    | <b>Observational</b><br><br>Cognitive and behavioural effects of carbamazepine in rolandic children. | <ul style="list-style-type: none"> <li>• 27 Children</li> <li>• 12 diagnosed with benign rolandic epilepsy or migraine headache, 15 with migraine</li> <li>• Mean age BECTS: 9.7, aged between 6-12 years</li> </ul> | Intelligence<br><br>Language<br><br>Memory<br><br>Motor skills                        | Wechsler Intelligence Scale for Children 3 <sup>rd</sup> edition<br><br>Boston Naming Test<br><br>Wide Range Assessment of Memory and Learning<br><br>Finger tapping test, Grooved pegboard test        |

Supplementary 2. Characteristics of included papers and provisional list of papers





| Study no. | Author (year) & (Reference no.) | Type of study/study design                                                                                                                                                                               | Sample characteristics                                                                                                                                                                                          | Outcome domains                                                                                                                                                           | Outcome measures                                                                                                                                                                                                                                                                           |
|-----------|---------------------------------|----------------------------------------------------------------------------------------------------------------------------------------------------------------------------------------------------------|-----------------------------------------------------------------------------------------------------------------------------------------------------------------------------------------------------------------|---------------------------------------------------------------------------------------------------------------------------------------------------------------------------|--------------------------------------------------------------------------------------------------------------------------------------------------------------------------------------------------------------------------------------------------------------------------------------------|
| 30        | Turky et al., (2008)<br>(30)    | <b>Observational</b><br><br>Epidemiological study aimed at determining the prevalence of behavioural and emotional problems in a UK community-based population of children and adolescents with epilepsy | <ul style="list-style-type: none"> <li>• 56 children and adolescents with epilepsy aged 4-17.</li> <li>• 25 males, 31 females.</li> <li>• Diagnosis of epilepsy, age at epilepsy onset: 6 years old.</li> </ul> | <p>Strengths &amp; difficulties</p> <p>Seizure severity</p> <p>Moods, feelings &amp; emotions</p> <p>Impact of paediatric epilepsy</p> <p>Quality of life in epilepsy</p> | <p>Strengths &amp; difficulties questionnaire (SDQ)</p> <p>Revised Liverpool Seizure Severity Scale</p> <p>The Moods and Feelings Questionnaire (MFQ)</p> <p>The Impact of Paediatric epilepsy scale (IPES)</p> <p>Quality of Life in Epilepsy Inventory for Adolescents (QOLIE-AD-48)</p> |
| 31        | Turner et al., (2004)<br>(31)   | <b>Observational</b><br><br>Prospective, randomized, single-blinded, crossover, placebo-controlled, pilot clinical trial investigating exposure to music on EEG of children with BECTS.                  | <ul style="list-style-type: none"> <li>• 4 children aged 5-9 years, were selected from EEGs diagnostic of BECTS</li> </ul>                                                                                      | Interictal epileptiform discharges (IED)                                                                                                                                  | EEG                                                                                                                                                                                                                                                                                        |
| 32        | Verhey et al., (2009)<br>(32)   | <b>Observational</b><br><br>QOL in children with epilepsy and agreement between child and parent                                                                                                         | <ul style="list-style-type: none"> <li>• Children aged 8-17 years were included with a diagnosis of active epilepsy</li> <li>• 375 children and 378 parents</li> </ul>                                          | Health related quality of life                                                                                                                                            | CHEQOL-25                                                                                                                                                                                                                                                                                  |

Supplementary 2. Characteristics of included papers and provisional list of papers

| Study no. | Author (year) & (Reference no.)    | Type of study/study design                                                                           | Sample characteristics                                                                                                                                                                    | Outcome domains                                                                                                               | Outcome measures |
|-----------|------------------------------------|------------------------------------------------------------------------------------------------------|-------------------------------------------------------------------------------------------------------------------------------------------------------------------------------------------|-------------------------------------------------------------------------------------------------------------------------------|------------------|
| 33        | Wille et al., (2010)<br><br>(33)   | <b>Preference based/HRQOL measure</b><br><br>Development of the EQ-5D-Y                              | <ul style="list-style-type: none"> <li>Epilepsy measure designed for young people</li> </ul>                                                                                              | Mobility<br><br>Looking after myself<br><br>Usual activities<br><br>Pain/discomfort and feeling worried<br><br>Sad or unhappy | EQ-5DY           |
| 34        | Stevens et al., (2011)<br><br>(34) | <b>Preference based/HRQOL measure</b><br><br>Development of the Child Health Utility (CHU9D)         | <ul style="list-style-type: none"> <li>247 children recruited from general and clinical paediatric populations tested</li> </ul>                                                          | Sad<br><br>Pain<br><br>Tired<br><br>Annoyed<br><br>School Work<br><br>Sleep<br><br>Daily routines and activities              | CHU9D            |
| 35        | Feeny et al., (2002)<br><br>(35)   | <b>Preference based/HRQOL measure</b><br><br>Development of the Health Utilities Index Mark 3 (HUI3) | <ul style="list-style-type: none"> <li>A random sample of the general population (<math>\geq 16</math> years of age) in Hamilton, Ontario, Canada completed preference surveys</li> </ul> | Vision<br><br>Hearing<br><br>Speech<br><br>Ambulation<br><br>Dexterity<br><br>Emotion                                         | HUI3             |

Supplementary 2. Characteristics of included papers and provisional list of papers

| Study no. | Author (year) & (Reference no.)    | Type of study/study design                             | Sample characteristics                                                                                                                                                                                  | Outcome domains                                                                                       | Outcome measures                                                                                                                                                                                                                                                                                                                                                                                                            |
|-----------|------------------------------------|--------------------------------------------------------|---------------------------------------------------------------------------------------------------------------------------------------------------------------------------------------------------------|-------------------------------------------------------------------------------------------------------|-----------------------------------------------------------------------------------------------------------------------------------------------------------------------------------------------------------------------------------------------------------------------------------------------------------------------------------------------------------------------------------------------------------------------------|
|           |                                    |                                                        |                                                                                                                                                                                                         | Cognition<br>Pain                                                                                     |                                                                                                                                                                                                                                                                                                                                                                                                                             |
| 36        | Mulhern et al., (2012)<br><br>(36) | <b>Preference based/HRQOL measure</b><br><br>NEWQoL-6D | Epilepsy measure designed for adults <ul style="list-style-type: none"> <li>Used sample of 1611 respondents with newly diagnosed epilepsy from SANAD study to generate classification system</li> </ul> | Worry about attacks<br><br>Depression<br><br>Memory<br><br>Concentration<br><br>Stigma<br><br>Control | NewQoL-6d                                                                                                                                                                                                                                                                                                                                                                                                                   |
| 37        | Sadeghi et al., 2014<br><br>(37)   | <b>SR of outcome measures</b>                          | Conceptual analysis – no participants<br><br>Conceptual/theoretical analysis – no participants                                                                                                          |                                                                                                       | DISABKIDS (Epilepsy Module)<br><br>ECQ (Epilepsy and children questionnaire)<br><br>ELQOL (epilepsy and learning disabilities quality of life)<br><br>EFA (Epilepsy Foundations of American Concerns Index)<br><br>Glasgow Epilepsy Outcome Scale (GEOS-C)<br><br>ICI (Impact of Childhood Illness)<br><br>ICNDS (Impact of Childhood Neurologic Disability)<br><br>IPES (Impact of Paediatric epilepsy scale)<br><br>QOLCE |

Supplementary 2. Characteristics of included papers and provisional list of papers

| Study no. | Author (year) & (Reference no.) | Type of study/study design | Sample characteristics | Outcome domains | Outcome measures                                                                   |
|-----------|---------------------------------|----------------------------|------------------------|-----------------|------------------------------------------------------------------------------------|
|           |                                 |                            |                        |                 | QOLIE-AD<br>QOLPES (Quality of life in paediatric epilepsy)<br>PedsQL<br>Neuro-QOL |

Supplementary 2. Characteristics of included papers and provisional list of papers

**Table S2.2** - Provisional list of outcomes identified from systematic review and provided to the team

| COMET Taxonomy                                | Outcome Domain | Aspects of health | Outcome identified verbatim in individual study                    | Study number of papers retrieved from systematic review (See Table 1) |
|-----------------------------------------------|----------------|-------------------|--------------------------------------------------------------------|-----------------------------------------------------------------------|
| <b>Physiological: Nervous System Outcomes</b> | Seizures       | Seizure remission | Proportion seizure free                                            | 8, 18, 28                                                             |
|                                               |                |                   | Proportion of patients who are seizure free at 3 months, 12 months | 28                                                                    |
|                                               |                |                   | Complete seizure freedom                                           | 8                                                                     |
|                                               |                | Seizure frequency | Seizure frequency                                                  | 7, 13, 18                                                             |
|                                               |                |                   | Seizure frequency and severity                                     | 11                                                                    |
|                                               |                |                   | Mean seizure frequency per month                                   | 18, 20                                                                |
|                                               |                | Seizure duration  | Mean seizure duration                                              | 20, 18                                                                |
|                                               |                | Seizure severity  | Seizure severity                                                   | 10, 22, 30, 37                                                        |
|                                               |                |                   | Severity of epilepsy                                               | 24, 22                                                                |
|                                               |                | Seizure control   | Seizure control                                                    | 18                                                                    |

| COMET Taxonomy              | Outcome Domain | Aspects of health                             | Outcome identified verbatim in individual study | Study number of papers retrieved from systematic review (See Table 1) |
|-----------------------------|----------------|-----------------------------------------------|-------------------------------------------------|-----------------------------------------------------------------------|
| <b>Physical Functioning</b> | Sleep          | Sleep duration                                | Overall sleep                                   | 10                                                                    |
|                             |                |                                               | Sleep start time & end                          | 23                                                                    |
|                             |                |                                               | Assumed sleep per night                         | 23                                                                    |
|                             |                |                                               | Actual sleep per night                          | 23                                                                    |
|                             |                |                                               | Assumed sleep per nap                           | 23                                                                    |
|                             |                |                                               | Actual sleep time per nap                       | 23                                                                    |
|                             |                |                                               | No. of hours of sleep                           | 10                                                                    |
|                             |                |                                               | Nap per day                                     | 23                                                                    |
|                             |                |                                               | Sleep                                           | 34                                                                    |
|                             |                |                                               | Sleep quality                                   |                                                                       |
|                             |                | Disorders of initiating and maintaining sleep | 10                                              |                                                                       |
|                             |                | Sleep breathing disorders                     | 10                                              |                                                                       |
|                             |                | Sleep quality                                 | 10                                              |                                                                       |
|                             |                | Sleep hyperhidrosis                           | 10                                              |                                                                       |
|                             |                | Sleep disturbance/insomnia                    | 10                                              |                                                                       |
|                             |                | Disorders of arousal                          | 10                                              |                                                                       |
|                             |                | Sleep-wake transition disorders               | 10, 23                                          |                                                                       |
|                             |                | Breathing problems/headache in sleep          | 10                                              |                                                                       |

Supplementary 2. Characteristics of included papers and provisional list of papers

| COMET Taxonomy | Outcome Domain  | Aspects of health    | Outcome identified verbatim in individual study | Study number of papers retrieved from systematic review (See Table 1) |
|----------------|-----------------|----------------------|-------------------------------------------------|-----------------------------------------------------------------------|
|                |                 | Sleep efficiency     | Sleep adequacy                                  | 10                                                                    |
|                |                 |                      | Morningness/eveningness                         | 23                                                                    |
|                |                 | Daytime sleepiness   | Sleepiness                                      | 23                                                                    |
|                |                 |                      | Disorders of excessive somnolence               | 10                                                                    |
|                |                 |                      | Daytime somnolence                              | 10                                                                    |
|                |                 |                      | Energy/fatigue                                  | 20, 37                                                                |
|                |                 |                      | Tired                                           | 34                                                                    |
|                | Physical health | Pain                 | Bodily pain/discomfort                          | 1, 2                                                                  |
|                |                 |                      | Pain/discomfort – feeling worried               | 33                                                                    |
|                |                 |                      | Pain                                            | 34, 35, 37,                                                           |
|                |                 | Physical functioning | Physical functioning                            | 1, 14, 22, 30, 37                                                     |
|                |                 |                      | Physical restrictions                           | 10, 20, 37                                                            |
|                |                 |                      | Physical wellbeing                              | 10                                                                    |
|                |                 |                      | Physical impact of epilepsy                     | 21                                                                    |
|                |                 |                      | Role/social limitations physical                | 1, 2                                                                  |
|                |                 |                      | Change in health                                | 1, 2, 37                                                              |
|                |                 |                      |                                                 | 37                                                                    |

Supplementary 2. Characteristics of included papers and provisional list of papers

| COMET Taxonomy            | Outcome Domain   | Aspects of health    | Outcome identified verbatim in individual study | Study number of papers retrieved from systematic review (See Table 1) |
|---------------------------|------------------|----------------------|-------------------------------------------------|-----------------------------------------------------------------------|
|                           |                  |                      | Physical health                                 |                                                                       |
|                           | Manual ability   | Manual ability       | Mobility                                        | 33                                                                    |
|                           |                  |                      | Ambulation                                      | 35                                                                    |
|                           |                  |                      | Dexterity                                       | 35                                                                    |
|                           |                  |                      | Motor skills                                    | 25                                                                    |
| <b>Social Functioning</b> | Usual activities | Usual activities     | Usual activities                                | 33                                                                    |
|                           |                  | Recreation & Leisure | Activity restrictions                           | 4                                                                     |
|                           |                  |                      | Social activities                               | 20, 37                                                                |
|                           |                  | Self-care            | Looking after self                              | 33                                                                    |
|                           |                  |                      | Independence                                    | 37                                                                    |
|                           | Behaviour        | Behaviour            | Behaviour                                       | 1, 2, 30, 24                                                          |
|                           |                  |                      | Behavioural regulation                          | 24                                                                    |
|                           |                  |                      | Internalizing behaviour                         | 25                                                                    |
|                           |                  |                      | Externalizing behaviour                         | 25                                                                    |
|                           |                  |                      | Self-concept: behavioural adjustment            | 26                                                                    |
|                           |                  |                      | Conduct problems                                | 30                                                                    |

Supplementary 2. Characteristics of included papers and provisional list of papers



| COMET Taxonomy | Outcome Domain | Aspects of health                           | Outcome identified verbatim in individual study | Study number of papers retrieved from systematic review (See Table 1) |
|----------------|----------------|---------------------------------------------|-------------------------------------------------|-----------------------------------------------------------------------|
|                |                |                                             | Prosocial behaviour                             | 30                                                                    |
|                |                |                                             | Peer problems                                   | 30                                                                    |
|                |                |                                             | Parental ratings of behaviour                   | 25                                                                    |
|                |                |                                             | Social behaviour                                | 30, 37                                                                |
|                |                |                                             | Social health: sociability                      | 37                                                                    |
|                |                |                                             | Social health: social role performance          | 37                                                                    |
|                |                |                                             | Role/social limitations: behavioural            | 1, 2                                                                  |
|                |                | Family functioning & cohesion               | Family cohesion                                 | 1, 2                                                                  |
|                |                |                                             | Family activities                               | 1, 2                                                                  |
|                |                |                                             | Family resources                                | 22                                                                    |
|                |                |                                             | Parent impact – time/emotion                    | 1, 2, 37                                                              |
|                |                | Educational participation                   | School environment                              | 10, 14                                                                |
|                | Social         | Social life/Engagement with friends & peers | Social exclusion in epilepsy                    | 4                                                                     |
|                |                |                                             | Teasing/bullying                                | 4, 21                                                                 |

Supplementary 2. Characteristics of included papers and provisional list of papers

| COMET Taxonomy | Outcome Domain | Aspects of health | Outcome identified verbatim in individual study                        | Study number of papers retrieved from systematic review (See Table 1) |
|----------------|----------------|-------------------|------------------------------------------------------------------------|-----------------------------------------------------------------------|
|                |                |                   | Social embarrassment of medicine taking                                | 6                                                                     |
|                |                |                   | Limiting social freedom                                                | 6                                                                     |
|                |                |                   | Social life                                                            | 17                                                                    |
|                |                |                   | Social interactions                                                    | 20, 37                                                                |
|                |                |                   | Peers & Social support                                                 | 10                                                                    |
|                |                |                   | Social functioning                                                     | 14, 22, 30, 37                                                        |
|                |                |                   | Social interactions                                                    | 20, 37                                                                |
|                |                |                   | Peer problems                                                          | 30                                                                    |
|                |                |                   | Social support                                                         | 30, 37                                                                |
|                |                |                   | Interpersonal/social                                                   | 32, 37                                                                |
|                |                |                   | Teasing/bullying                                                       | 4, 21                                                                 |
|                |                |                   | Communication                                                          | 26, 30, 37                                                            |
|                |                |                   | Social impact of epilepsy/Impact on social activities                  | 37                                                                    |
|                |                | Stigma            | Social embarrassment of medicine taking                                | 6                                                                     |
|                |                |                   | Inescapable inferiority and discrimination: vulnerability to prejudice | 6                                                                     |
|                |                |                   | Unwanted special attention                                             | 6                                                                     |

Supplementary 2. Characteristics of included papers and provisional list of papers

| COMET Taxonomy                         | Outcome Domain       | Aspects of health                     | Outcome identified verbatim in individual study                     | Study number of papers retrieved from systematic review (See Table 1) |                                                  |    |
|----------------------------------------|----------------------|---------------------------------------|---------------------------------------------------------------------|-----------------------------------------------------------------------|--------------------------------------------------|----|
|                                        |                      |                                       | Stigma                                                              | 4, 36, 37, 20, 30                                                     |                                                  |    |
| <b>Role functioning</b>                | Family relationships | Autonomy & relationships with parents | Family relationships & functioning                                  | 22, 37                                                                |                                                  |    |
|                                        |                      |                                       | Autonomy & parent relations                                         | 10                                                                    |                                                  |    |
|                                        |                      |                                       | Family life event changes                                           | 22                                                                    |                                                  |    |
|                                        |                      |                                       | Autonomy                                                            | NF                                                                    |                                                  |    |
|                                        |                      |                                       | Family                                                              | NF                                                                    |                                                  |    |
|                                        |                      |                                       | Impact of epilepsy on relationships with family, peers and siblings | 37                                                                    |                                                  |    |
| <b>Emotional functioning/wellbeing</b> | Mental Health        | Behavioural difficulties              | Behavioural difficulties                                            | 30                                                                    |                                                  |    |
|                                        |                      |                                       | Depression                                                          | 20, 23, 36, 22, 34, 33                                                |                                                  |    |
|                                        |                      |                                       | Sad                                                                 | 34                                                                    |                                                  |    |
|                                        |                      |                                       | Sad or unhappy                                                      | 33                                                                    |                                                  |    |
|                                        |                      | Anxiety                               | Anxiety                                                             | 20, 37                                                                |                                                  |    |
|                                        |                      |                                       | Self-esteem                                                         | 1, 2, 20, 37                                                          |                                                  |    |
|                                        |                      |                                       |                                                                     |                                                                       | Over-all self-concept                            | 26 |
|                                        |                      |                                       |                                                                     |                                                                       | Self-concept: physical appearance and attributes | 26 |

Supplementary 2. Characteristics of included papers and provisional list of papers

| COMET Taxonomy | Outcome Domain | Aspects of health | Outcome identified verbatim in individual study | Study number of papers retrieved from systematic review (See Table 1) |
|----------------|----------------|-------------------|-------------------------------------------------|-----------------------------------------------------------------------|
|                |                | Mental wellbeing  | Mental health                                   | 1, 2                                                                  |
|                |                |                   | Psychological wellbeing                         | 10                                                                    |
|                |                |                   | Emotional control                               | 24                                                                    |
|                |                |                   | Self-concept: happiness & satisfaction          | 26                                                                    |
|                |                |                   | Moods, feelings and emotions (over 2 weeks)     | 30, 37                                                                |
|                |                |                   | Mood/Mood state                                 | 37                                                                    |
|                |                |                   | Intrapersonal/emotional                         | 32                                                                    |
|                |                |                   | Annoyed                                         | 34, 37                                                                |
|                |                |                   | Emotion                                         | 35                                                                    |
|                |                |                   | Optimism                                        | 37                                                                    |
|                |                |                   | Emotional functioning                           | 37                                                                    |
|                |                |                   | Attitude towards epilepsy                       | 26, 30, 37                                                            |
|                |                |                   | Fear of seizures                                | NF                                                                    |
|                |                |                   | Psychological functioning                       | 14                                                                    |
|                |                |                   | Control/helplessness                            | 20, 37                                                                |
|                |                |                   | Impact of epilepsy (psychosocial)               | 30, 26                                                                |
|                |                |                   | Emotional disorders                             | 30                                                                    |

Supplementary 2. Characteristics of included papers and provisional list of papers

| COMET Taxonomy               | Outcome Domain | Aspects of health    | Outcome identified verbatim in individual study                    | Study number of papers retrieved from systematic review (See Table 1) |
|------------------------------|----------------|----------------------|--------------------------------------------------------------------|-----------------------------------------------------------------------|
|                              |                |                      | Role/social limitations emotional                                  | 1, 2                                                                  |
|                              |                |                      | Epilepsy impact: effects of epilepsy and antiepileptic medications | 30                                                                    |
|                              |                |                      | Disclosure & normality                                             | 6, 32, 37                                                             |
|                              |                | Secrecy              | Secrecy                                                            | 32, 4                                                                 |
|                              |                |                      | Concealment                                                        | 4                                                                     |
|                              |                | Fears about epilepsy | Parental fears about the impact of a child's seizure               | 14                                                                    |
|                              |                |                      | Worries/concerns                                                   | 32, 34, 36, 37                                                        |
|                              |                |                      | Concerns about epilepsy                                            | 37                                                                    |
|                              |                |                      | Future worries                                                     | 37                                                                    |
|                              |                |                      | Fear of seizures                                                   | 37                                                                    |
|                              |                |                      | Parental concern                                                   | 37                                                                    |
|                              |                |                      | Impact of seizures                                                 | 37                                                                    |
|                              |                |                      | Prospects for the future                                           | 37                                                                    |
| <b>Cognitive Functioning</b> | Cognition      | Language & Literacy  | Reading                                                            | 9                                                                     |
|                              |                |                      | Phonological processing                                            | 9                                                                     |

Supplementary 2. Characteristics of included papers and provisional list of papers

| COMET Taxonomy | Outcome Domain | Aspects of health     | Outcome identified verbatim in individual study    | Study number of papers retrieved from systematic review (See Table 1) |
|----------------|----------------|-----------------------|----------------------------------------------------|-----------------------------------------------------------------------|
|                |                |                       | Expressive language                                | 9, 20, 25, 37                                                         |
|                |                |                       | Receptive language                                 | 9, 20, 25, 37                                                         |
|                |                |                       | Speech                                             | 35                                                                    |
|                |                | Memory                | Memory                                             | 18, 22, 30, 25, 27, 30, 36, 37                                        |
|                |                |                       | Working memory                                     | 24                                                                    |
|                |                | Intelligence          | IQ scores                                          | 18, 24, 25, 29                                                        |
|                |                | Concentration         | Attention/concentration                            | 20, 30, 36, 25, 37                                                    |
|                |                |                       | Hyperactivity/inattention                          | 30                                                                    |
|                |                | Executive functioning | Metacognitive index                                | 24                                                                    |
|                |                |                       | Planning/organisation                              | 24                                                                    |
|                |                |                       | Executive functioning (Global executive composite) | 24                                                                    |
|                |                | Cognition             | Speeded visual search and mental flexibility       | 25                                                                    |
|                |                |                       | Cognition                                          | 35                                                                    |
|                |                |                       | Cognitive function                                 | 1, 37, 22                                                             |
|                |                |                       | Control                                            | 36                                                                    |

Supplementary 2. Characteristics of included papers and provisional list of papers

| COMET Taxonomy                | Outcome Domain         | Aspects of health      | Outcome identified verbatim in individual study | Study number of papers retrieved from systematic review (See Table 1) |
|-------------------------------|------------------------|------------------------|-------------------------------------------------|-----------------------------------------------------------------------|
|                               |                        |                        | Cognitive effects of epilepsy                   | 37                                                                    |
|                               |                        |                        | Applied cognition: general concerns             | 37                                                                    |
|                               |                        |                        | Speeded visual search and mental flexibility    | 25                                                                    |
|                               |                        |                        | Other cognitive                                 | 37                                                                    |
|                               |                        | School performance     | Self-concept: Intellectual and school status    | 26                                                                    |
|                               |                        |                        | School/scholastic functioning                   | 37                                                                    |
|                               |                        |                        | Education                                       | 37                                                                    |
|                               |                        |                        | Impact of epilepsy on academic achievement      | 37                                                                    |
|                               |                        |                        | Impact of epilepsy on school                    | 10                                                                    |
|                               |                        |                        | Academic self-concept:                          | 26                                                                    |
| <b>Global quality of life</b> | Global quality of life | Global quality of life | Global general health                           | 1, 2, 14, 20, 22, 30, 32, 37                                          |
|                               |                        |                        | General health perceptions                      | 1, 2, 30, 37                                                          |
|                               |                        |                        | Impact of epilepsy on health                    | 37                                                                    |
|                               |                        |                        | General/overall health                          | 37                                                                    |
|                               |                        |                        | Overall impact of epilepsy                      | 37                                                                    |

Supplementary 2. Characteristics of included papers and provisional list of papers

| COMET Taxonomy                | Outcome Domain | Aspects of health         | Outcome identified verbatim in individual study | Study number of papers retrieved from systematic review (See Table 1) |
|-------------------------------|----------------|---------------------------|-------------------------------------------------|-----------------------------------------------------------------------|
|                               |                |                           | Total impact of childhood neurologic disability | 37                                                                    |
|                               |                |                           | Health related quality of life                  | 14, 20, 30, 32, 37                                                    |
| <b>Adverse events/effects</b> | Adverse events | Unintended adverse events | Routine urine test                              | 13, 5                                                                 |
|                               |                |                           | Liver and renal function                        | 13                                                                    |
|                               |                |                           | Weight                                          | 13                                                                    |
|                               |                |                           | Routine blood test                              | 13                                                                    |
|                               |                |                           | Paediatric epilepsy side effects                | 14, 18, 10                                                            |
|                               |                |                           | Adverse events                                  | 18, 19, 28, NF, 5, 7, 13, 15, 30, 35, 37, 11                          |
|                               |                |                           | Anti-epileptic drug side effects                | 37, 10                                                                |
|                               |                |                           | Seizure effects                                 | 37                                                                    |
|                               |                |                           | Headache                                        | 15                                                                    |
|                               |                |                           | Hearing                                         | 35                                                                    |
|                               |                |                           | Vision                                          | 35                                                                    |
|                               |                |                           | Safety/injury                                   | 37                                                                    |

Supplementary 2. Characteristics of included papers and provisional list of papers



## References

1. Baca CB, Vickrey BG, Caplan R, Vassar SD, Berg AT. Psychiatric and medical comorbidity and quality of life outcomes in childhood-onset epilepsy. *Pediatrics*. 2011;peds-2011.
2. Baca CB, Vickrey BG, Vassar SD, Berg AT. Seizure recency and quality of life in adolescents with childhood-onset epilepsy. *Epilepsy Behav*. 2012;23(1):47–51.
3. Bast T, Völp A, Wolf C, For The Sulthiame Study Group DR. The influence of sulthiame on EEG in children with benign childhood epilepsy with centrotemporal spikes (BECTS). *Epilepsia*. 2003;44(2):215–20.
4. Benson A, O’Toole S, Lambert V, Gallagher P, Shahwan A, Austin JK. The stigma experiences and perceptions of families living with epilepsy: implications for epilepsy-related communication within and external to the family unit. *Patient Educ Couns*. 2016;99(9):1473–81.
5. Borggraefe I, Bonfert M, Bast T, Neubauer BA, Schotten KJ, Maßmann K, et al. Levetiracetam vs. sulthiame in benign epilepsy with centrotemporal spikes in childhood: a double-blinded, randomized, controlled trial (German HEAD Study). *Eur J Paediatr Neurol*. 2013;17(5):507–14.
6. Chong L, Jamieson NJ, Gill D, Singh-Grewal D, Craig JC, Ju A, et al. Children’s experiences of epilepsy: a systematic review of qualitative studies. *Pediatrics*. 2016;138(3):e20160658.
7. Cummins C. The clinical effectiveness and cost-effectiveness of newer drugs for children with epilepsy. *Inf Sci*. 121(414):6769.
8. Coppola G, Franzoni E, Verrotti A, Garone C, Sarajlija J, Operto FF, et al. Levetiracetam or oxcarbazepine as monotherapy in newly diagnosed benign epilepsy of childhood with centrotemporal spikes (BECTS): an open-label, parallel group trial. *Brain Dev*. 2007;29(5):281–4.
9. Smith AB, Bajomo O, Pal DK. A meta-analysis of literacy and language in children with rolandic epilepsy. *Dev Med Child Neurol*. 2015;57(11):1019–26.
10. Gutter T, Brouwer OF, de Weerd AW. Subjective sleep disturbances in children with partial epilepsy and their effects on quality of life. *Epilepsy Behav*. 2013;28(3):481–8.
11. Kim E-H, Yum M-S, Shim W-H, Yoon H-K, Lee Y-J, Ko T-S. Structural abnormalities in benign childhood epilepsy with centrotemporal spikes (BCECTS). *Seizure*. 2015;27:40–6.
12. Lewis A, Parsons S. Understanding of epilepsy by children and young people with epilepsy. *Eur J Spec Needs Educ*. 2008;23(4):321–35.
13. Liu C, Song M, Wang J. Nightly oral administration of topiramate for benign childhood epilepsy with centrotemporal spikes. *Child’s Nerv Syst*. 2016;32(5):839–43.
14. Loiselle KA, Ramsey RR, Rausch JR, Modi AC. Trajectories of health-related quality of life among children with newly diagnosed epilepsy.

Supplementary 2. Characteristics of included papers and provisional list of papers

- J Pediatr Psychol. 2016;41(9):1011–21.
15. Melchionda D, Verrotti A, Chiarelli F, Domizio S, Sabatino G, Mucedola T, et al. Headache in children with centrotemporal spikes. *Neurophysiol Clin Neurophysiol*. 1999;29(1):90–100.
  16. Mitsudome A, Ohfu M, Yasumoto S, Ogawa A, Hirosea S, Ogata H, et al. The effectiveness of clonazepam on the Rolandic discharges. *Brain Dev*. 1997;19(4):274–8.
  17. Moffat C, Dorris L, Connor L, Espie CA. The impact of childhood epilepsy on quality of life: A qualitative investigation using focus group methods to obtain children’s perspectives on living with epilepsy. *Epilepsy Behav*. 2009;14(1):179–89.
  18. Nevitt SJ, Marson AG, Weston J, Tudur Smith C. Carbamazepine versus phenobarbitone monotherapy for epilepsy: an individual participant data review. *Cochrane Libr*. 2016;
  19. Wolf C, Bast T. Sulthiame as monotherapy in children with benign childhood epilepsy with centrotemporal spikes: a 6-month randomized, double-blind, placebo-controlled study. *Epilepsia*. 2000;41(10):1284–8.
  20. Reilly C, Atkinson P, Das KB, Chin RFM, Aylett SE, Burch V, et al. Factors associated with quality of life in active childhood epilepsy: a population-based study. *Eur J Paediatr Neurol*. 2015;19(3):308–13.
  21. Ronen GM, Rosenbaum P, Law M, Streiner DL. Health-related quality of life in childhood epilepsy: the results of children’s participation in identifying the components. *Dev Med Child Neurol*. 1999;41(8):554–9.
  22. Sajobi TT, Wang M, Ferro MA, Brobbey A, Goodwin S, Speechley KN, et al. Multivariate trajectories across multiple domains of health-related quality of life in children with new-onset epilepsy. *Epilepsy Behav*. 2017;75:72–8.
  23. Schmitt B, Martin F, Critelli H, Molinari L, Jenni OG. Effects of valproic acid on sleep in children with epilepsy. *Epilepsia*. 2009;50(8):1860–7.
  24. Schraegle WA, Titus JB. Executive function and health-related quality of life in pediatric epilepsy. *Epilepsy Behav*. 2016;62:20–6.
  25. Seidel WT, Mitchell WG. Cognitive and behavioral effects of carbamazepine in children: data from benign rolandic epilepsy. *J Child Neurol*. 1999;14(11):716–23.
  26. Stafstrom CE, Havlena J, Krezinski AJ. Art therapy focus groups for children and adolescents with epilepsy. *Epilepsy Behav* [Internet]. 2012;24(2):227–33. Available from: <http://dx.doi.org/10.1016/j.yebeh.2012.03.030>
  27. Tacke M, Gerstl L, Heinen F, Heukaeufer I, Bonfert M, Bast T, et al. Effect of anticonvulsive treatment on neuropsychological performance in children with BECTS. *Eur J Paediatr Neurol*. 2016;20(6):874–9.
  28. Tan HJ, Singh J, Gupta R, de Goede C. Comparison of antiepileptic drugs, no treatment, or placebo for children with benign epilepsy with centro temporal spikes. *Cochrane Database Syst Rev*. 2014;9(9):Cd006779.
  29. Tedrus GMAS, Fonseca LC, Tonelotto JMF, Costa RM, Chiodi MG. Benign Childhood Epilepsy with Centra-Temporal Spikes: Quantitative EEG and the Wechsler Intelligence Scale for Children (WISC-III). *Clin EEG Neurosci*. 2006;37(3):193–7.

30. Turkey A, Beavis JM, Thapar AK, Kerr MP. Psychopathology in children and adolescents with epilepsy: an investigation of predictive variables. *Epilepsy Behav.* 2008;12(1):136–44.
31. Turner RP. The acute effect of music on interictal epileptiform discharges. *Epilepsy Behav.* 2004;5(5):662–8.
32. Verhey LH, Kulik DM, Ronen GM, Rosenbaum P, Lach L, Streiner DL. Quality of life in childhood epilepsy: what is the level of agreement between youth and their parents? *Epilepsy Behav.* 2009;14(2):407–10.
33. Wille N, Badia X, Bonsel G, Burström K, Cavrini G, Devlin N, et al. Development of the EQ-5D-Y: a child-friendly version of the EQ-5D. *Qual life Res.* 2010;19(6):875–86.
34. Stevens K. Assessing the performance of a new generic measure of health-related quality of life for children and refining it for use in health state valuation. *Appl Health Econ Health Policy.* 2011;9(3):157–69.
35. Feeny D, Furlong W, Torrance GW, Goldsmith CH, Zhu Z, DePauw S, et al. Multiattribute and single-attribute utility functions for the health utilities index mark 3 system. *Med Care.* 2002;40(2):113–28.
36. Mulhern B, Rowen D, Jacoby A, Marson T, Snape D, Hughes D, et al. The development of a QALY measure for epilepsy: NEWQOL-6D. *Epilepsy Behav.* 2012;24(1):36–43.
37. Sadeghi S, Fayed N, Ronen GM. Patient-reported outcome measures in pediatric epilepsy: A content analysis using World Health Organization definitions. *Epilepsia.* 2014;55(9):1431–7.
