# Supplementary material for: Core Health Outcomes in Childhood Epilepsy (CHOICE): Development of a core outcome set using systematic review methods and a Delphi survey consensus
Source: PubMed Central journal article supplement (PMC6563436; doi:10.1111/epi.14735), 2019-04-25
Supplement: EPI-60-857-s003.pdf [file EPI-60-857-s003.pdf]

### S3.1 - Demographics of participants from R2 of the Delphi survey

| <b>Characteristic</b>                  | <b>N (%)</b> |
|----------------------------------------|--------------|
| <b>Professionals</b>                   | 61 (100)     |
| <b><i>Place of residence in UK</i></b> |              |
| North East                             | 3 (5)        |
| North West                             | 1 (2)        |
| Yorkshire and The Humber               | 4 (7)        |
| East Midlands                          | 2 (3)        |
| West Midlands                          | 3 (5)        |
| East of England                        | 2 (3)        |
| London                                 | 18 (30)      |
| South East                             | 5 (8)        |
| South West                             | 9 (15)       |
| Scotland                               | 3 (5)        |
| Wales                                  | 5 (8)        |
| Ireland                                | 4 (7)        |
| Outside UK                             | 2 (3)        |
| <b><i>Ethnicity</i></b>                |              |
| White                                  | 44 (72)      |
| Black                                  | 2 (3)        |
| Asian                                  | 11 (18)      |
| Hispanic/Latino                        | 1 (2)        |
| Mixed race                             | 1 (2)        |
| Other                                  | 2(3)         |
| <b>Parents &amp; Young people</b>      | 19 (100)     |
| <b><i>Place of residence in UK</i></b> |              |
| North East                             | 0 (0)        |
| North West                             | 0 (0)        |
| Yorkshire and The Humber               | 1 (5)        |
| East Midlands                          | 1 (5)        |
| West Midlands                          | 0 (0)        |
| East of England                        | 0 (0)        |
| London                                 | 4 (21)       |
| South East                             | 2 (11)       |
| South West                             | 3 (16)       |
| Scotland                               | 0 (0)        |
| Wales                                  | 0 (0)        |
| Ireland                                | 4 (21)       |
| Outside UK                             | 4 (21)       |
| <b><i>Ethnicity</i></b>                |              |
| White                                  | 16 (84)      |
| Black                                  | 2 (11)       |

| <b>Characteristic</b>           | <b>N (%)</b>     |
|---------------------------------|------------------|
| Asian                           | 0 (0)            |
| Hispanic/Latino                 | 0 (0)            |
| Mixed race                      | 0 (0)            |
| Other                           | 1 (5)            |
| <b><i>Average child age</i></b> | 10.5, (s.d. 1.9) |
