# Supplementary material for: Core Health Outcomes in Childhood Epilepsy (CHOICE): Development of a core outcome set using systematic review methods and a Delphi survey consensus
Source: PubMed Central journal article supplement (PMC6563436; doi:10.1111/epi.14735), 2019-04-25
Supplement: EPI-60-857-s004.pdf [file EPI-60-857-s004.pdf]

Table S4.1 – Outcomes suggested after R1 of the Delphi survey

| <b>Additional outcome suggested</b>                                  | <b>Stakeholder &amp; Score</b> | <b>Score</b> | <b>Notes</b>                                                                                                                                                                                                 |
|----------------------------------------------------------------------|--------------------------------|--------------|--------------------------------------------------------------------------------------------------------------------------------------------------------------------------------------------------------------|
| <b>Frequency of hospital out-patient attendance for BECTS review</b> | Professional                   | 7            | New outcome identified<br><br><b>Outcome:</b><br>Attendance for medical appointments in outpatients<br><b>Domain:</b> Seizures<br><b>Description:</b><br>Routine attendances for medical epilepsy management |
| <b>seen by consultant with specialist expertise in epilepsy</b>      | Professional                   | 7            | No new outcomes represented in free-text response/already covered in outcomes.                                                                                                                               |
| <b>seen by consultant paediatric neurologist</b>                     | Professional                   | 7            | No new outcomes represented in free-text response/already covered in outcomes.                                                                                                                               |
| <b>seen by paediatric epilepsy specialist nurse</b>                  | Professional                   | 7            | No new outcomes represented in free-text response/already covered in outcomes.                                                                                                                               |
| <b>taking anti-convulsant for BECTS</b>                              | Professional                   | 8            | No new outcomes represented in free-text response/already covered in outcomes.                                                                                                                               |
| <b>Hospital attendances</b>                                          | Professional                   | 4            | New outcome identified<br><br><b>Outcome:</b><br>Unplanned hospital attendances at Accident & Emergency<br><b>Domain:</b> Adverse events<br><b>Description:</b><br>Visiting the hospital                     |

| Additional outcome suggested                                     | Stakeholder & Score | Score | Notes                                                                                                                                                                                                                              |
|------------------------------------------------------------------|---------------------|-------|------------------------------------------------------------------------------------------------------------------------------------------------------------------------------------------------------------------------------------|
|                                                                  |                     |       | due to an acute medical emergency                                                                                                                                                                                                  |
| <b>Hospital admissions</b>                                       | Professional        | 4     | New outcome identified<br><b>Outcome:</b> Unplanned epilepsy-related admission to hospital as inpatient<br><b>Domain:</b> Adverse Events<br><b>Description:</b> Unexpectedly needing to be admitted to hospital                    |
| <b>Change in medication; e.g. withdrawal or addition of AED</b>  | Professional        | 5     | New outcome identified<br><b>Outcome:</b> Drug treatment failure (adverse events or poor seizure control)<br><b>Domain:</b> Adverse Events<br><b>Description:</b> stopping medication because it's not working or causing problems |
| <b>Epilepsy in this person drug resistant (by ILAE criteria)</b> | Professional        | 4     | No new outcomes represented in free-text response/already covered in outcomes.                                                                                                                                                     |
| <b>list comorbidities</b>                                        | Professional        | 7     | No new outcomes represented in free-text response/already covered in outcomes.                                                                                                                                                     |
| <b>Evidence of parasomnia with awakening at night</b>            | Professional        | 7     | No new outcomes represented in free-text response/already covered in outcomes.                                                                                                                                                     |
| <b>Percentage of diagnosed</b>                                   | Professional        | 9     | No new outcomes represented in                                                                                                                                                                                                     |

| <b>Additional outcome suggested</b>                                                         | <b>Stakeholder &amp; Score</b> | <b>Score</b> | <b>Notes</b>                                                                   |
|---------------------------------------------------------------------------------------------|--------------------------------|--------------|--------------------------------------------------------------------------------|
| <b>comorbidities in children with RE</b>                                                    |                                |              | free-text response/already covered in outcomes.                                |
| <b>The types of seizures seen in the child with the diagnosis</b>                           | Professional                   | 6            | No new outcomes represented in free-text response/already covered in outcomes. |
| <b>The percentage of children with RE whose epilepsy evolves or becomes uncontrollable.</b> | Professional                   | 9            | No new outcomes represented in free-text response/already covered in outcomes. |
| <b>speech regression / aphasia</b>                                                          | Professional                   | 9            | No new outcomes represented in free-text response/already covered in outcomes. |
| <b>Awareness of SUDEP</b>                                                                   | Parent                         | 8            | No new outcomes represented in free-text response/already covered in outcomes. |
| <b>TICS</b>                                                                                 | Parent                         | 8            | No new outcomes represented in free-text response/already covered in outcomes. |
| <b>Improvement of deterioration of school work after starting treatment</b>                 | Professional                   | 6            | No new outcomes represented in free-text response/already covered in outcomes. |
| <b>Ability to play Sport</b>                                                                | Parent                         | 4            | No new outcomes represented in free-text response/already covered in outcomes. |
