# Supplementary material for: Core Health Outcomes in Childhood Epilepsy (CHOICE): Development of a core outcome set using systematic review methods and a Delphi survey consensus
Source: PubMed Central journal article supplement (PMC6563436; doi:10.1111/epi.14735), 2019-04-25
Supplement: EPI-60-857-s007.pdf [file EPI-60-857-s007.pdf]

CHOICE – Core Health Outcomes in Childhood Epilepsy  
 COS STAR Checklist

| SECTION/TOPIC             | ITEM No. | CHECKLIST ITEM                                                                                                   | PAGE No. IN DOCUMENT |
|---------------------------|----------|------------------------------------------------------------------------------------------------------------------|----------------------|
| <b>TITLE/ABSTRACT</b>     |          |                                                                                                                  |                      |
| Title                     | 1a       | Identify in the title that the paper reports the development of a COS                                            | 1                    |
| Abstract                  | 1b       | Provide a structured summary                                                                                     | 3                    |
| <b>INTRODUCTION</b>       |          |                                                                                                                  |                      |
| Background and objectives | 2a       | Describe the background and explain the rationale for developing the COS                                         | 5-7                  |
|                           | 2b       | Describe the specific objectives with reference to developing a COS                                              | 5-7                  |
| Scope                     | 3a       | Describe the health condition(s) and populations(s) covered by the COS                                           | 5-7, 9               |
|                           | 3b       | Describe the intervention(s) covered by the COS                                                                  | 5-7, 9               |
|                           | 3c       | Describe the setting(s) in which the COS is to be applied                                                        | 5-7, 9               |
| <b>METHODS</b>            |          |                                                                                                                  |                      |
| Protocol/Registry Entry   | 4        | Indicate where the COS development protocol can be accessed, if available, and/or the study registration details | 8                    |
| Participants              | 5        | Describe the rationale for stakeholder groups involved in the COS development                                    | 5-8, 10-12, 14-15    |

|                      |    |                                                                                                                                   |                                                   |
|----------------------|----|-----------------------------------------------------------------------------------------------------------------------------------|---------------------------------------------------|
|                      |    | process, eligibility criteria for participants from each group, and a description of how the individuals involved were identified |                                                   |
| Information Sources  | 6a | Describe the information sources used to identify an initial list of outcomes                                                     | 9-10, Figure 1, Supplementary 1 & 2               |
|                      | 6b | Describe how outcomes were dropped/combined, with reasons (if applicable)                                                         | 9, Supplementary 2 & 4                            |
| Consensus Process    | 7  | Describe how the consensus process was undertaken                                                                                 | 10-12, 14-15<br>Supplementary 5                   |
| Outcome Scoring      | 8  | Describe how the outcomes were scored and how scores were summarised                                                              | 10-12, 14-15                                      |
| Consensus Definition | 9a | Describe the consensus definition                                                                                                 | 10-12, 14-15                                      |
|                      | 9b | Describe the procedure for determining how outcomes were included or excluded from consideration during the consensus process     | 10-12, 14-15<br>Table 4,<br>Supplementary 4 and 5 |
| Ethics and Consent   | 10 | Provide a statement regarding the ethics and consent issues for the study                                                         | 8                                                 |
| <b>RESULTS</b>       |    |                                                                                                                                   |                                                   |
| Protocol Deviations  | 11 | Describe any changes from the protocol (if applicable), with reasons, and describe what                                           | 10, 14-15                                         |

|                       |     |                                                                                                                    |                                        |
|-----------------------|-----|--------------------------------------------------------------------------------------------------------------------|----------------------------------------|
|                       |     | impact these changes have on the results                                                                           |                                        |
| Participants          | 12  | Present data on the number and relevant characteristics of the people involved at all stages of COS development    | 14-15, Table 2 and Supplementary 2 & 5 |
| Outcomes              | 13a | List all outcomes considered at the start of the consensus process                                                 | Figure 2                               |
|                       | 13b | Describe any new outcomes introduced and any outcomes dropped, with reasons, during the consensus process          | Table 4, Supplementary 4 & 5           |
| COS                   | 14  | List all the outcomes in the final COS                                                                             | Figure 2                               |
| DISCUSSION            |     |                                                                                                                    |                                        |
| Limitations           | 15  | Discuss any limitations in the COS development process                                                             | 15-21                                  |
| Conclusions           | 16  | Provide an interpretation of the final COS in the context of other evidence, and implications for future research. | 17-21                                  |
| OTHER INFORMATION     |     |                                                                                                                    |                                        |
| Funding               | 17  | Describe sources of funding/role of funders                                                                        | 21                                     |
| Conflicts of interest | 18  | Describe any conflicts of interest within the study team and how these were managed                                | 22                                     |
